# Supplementary material for: Why is the ground state of m-benzoquinone a triplet?
Source: Royal Society of Chemistry journal article supplement (doi:10.1039/d3nj03212d), 2023-01-01

## Why is the ground state of *m*-benzoquinone triplet?

Luis Leyva-Parra<sup>a, b</sup>; Ricardo Pino-Rios<sup>\*c, d</sup>

<sup>a</sup>Universidad Andrés Bello, Facultad de Ciencias Exactas, Departamento de Ciencias Químicas, Centro de Química Teórica & Computacional (CQT&C), Avenida República 275, 8370146 Santiago de Chile, Chile. [l.leyvaparra@uandresbello.edu](mailto:l.leyvaparra@uandresbello.edu).

<sup>b</sup>Programa de Doctorado en Fisicoquímica Molecular, Facultad de Ciencias Exactas, Universidad Andrés Bello, Avenida República 275, Santiago de Chile 8370146, Chile

<sup>c</sup>Instituto de Estudios de la Salud, Universidad Arturo Prat. Iquique, 1100000. Chile. [rpinoarios@unap.cl](mailto:rpinoarios@unap.cl).

<sup>d</sup>Química y Farmacia, Facultad de Ciencias de la Salud, Universidad Arturo Prat. Casilla 121, Iquique, Chile, 1100000.

## SUPPORTING INFORMATION

**Figure S1.** Magnetically induced current density plot (1 a.u. above the molecular plane) of *m*-quinone in triplet (a), singlet (b) states, Resorcinol (c) and Benzene (d) calculated at the UM11-L/def2-TZVP level.

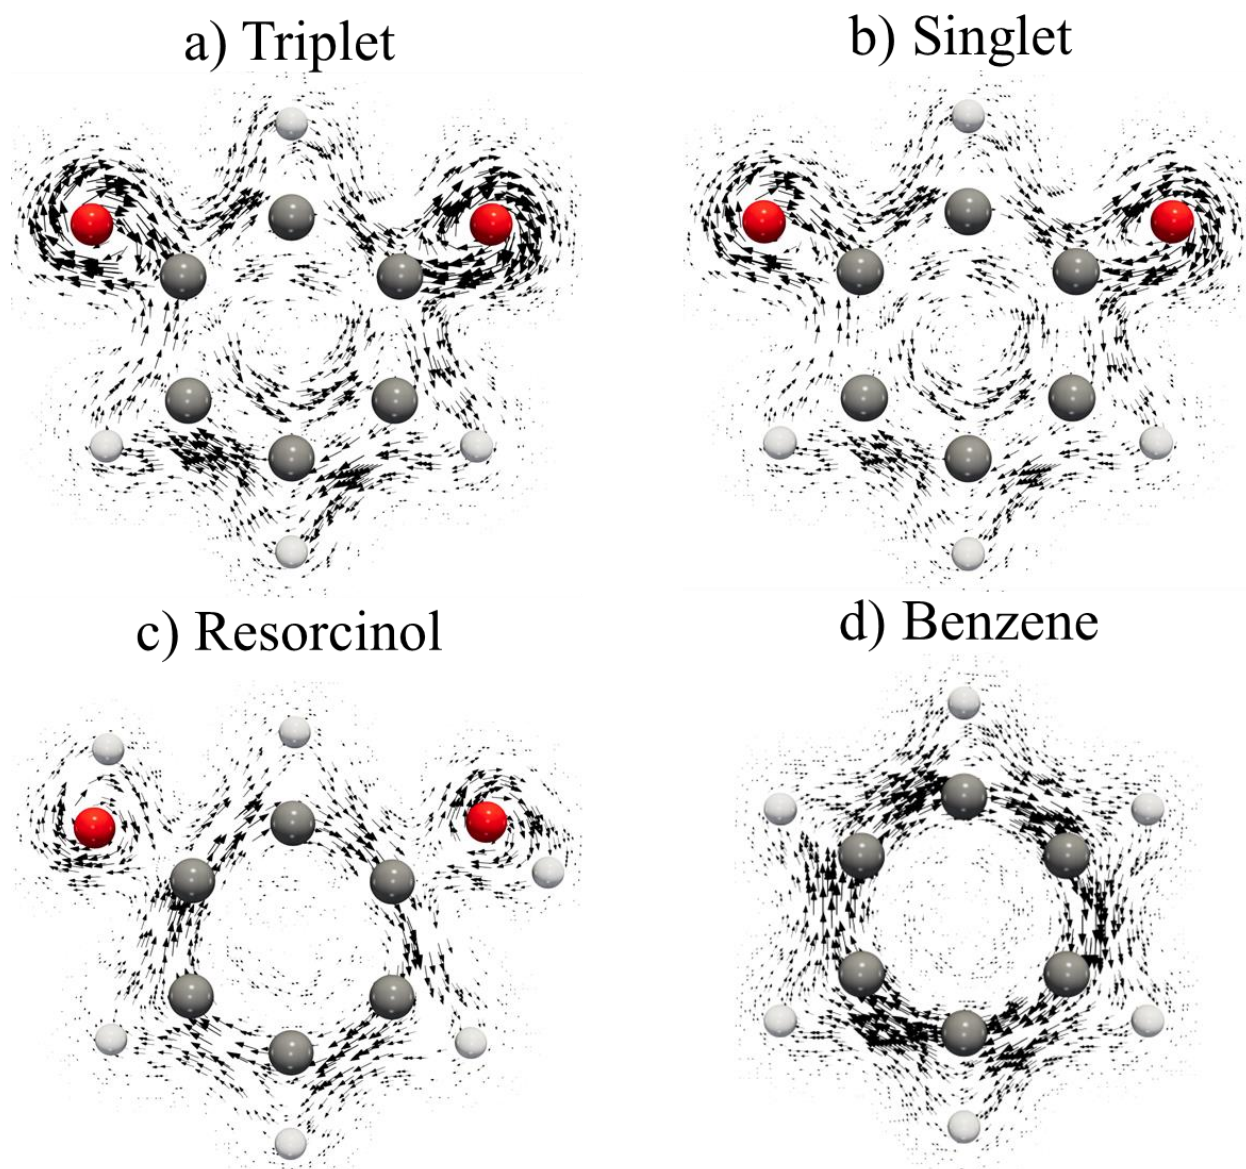

Supplement: d3nj03212d1.pdf [file d3nj03212d1.pdf]
